# Supplementary material
Source: Springer Nature journal article supplement (https://www.springermedizin.de/resource/supplementary/12885_2008_1337_MOESM4_ESM.pdf/9472512)

### MCF-7

A

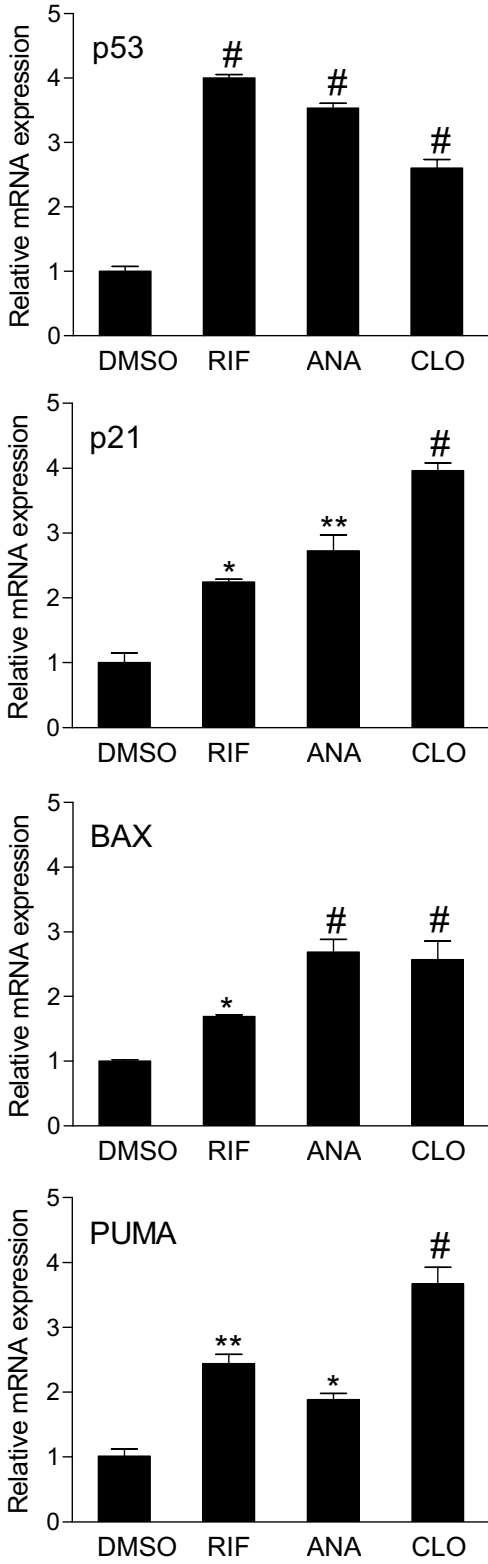

### ZR-75-1

B

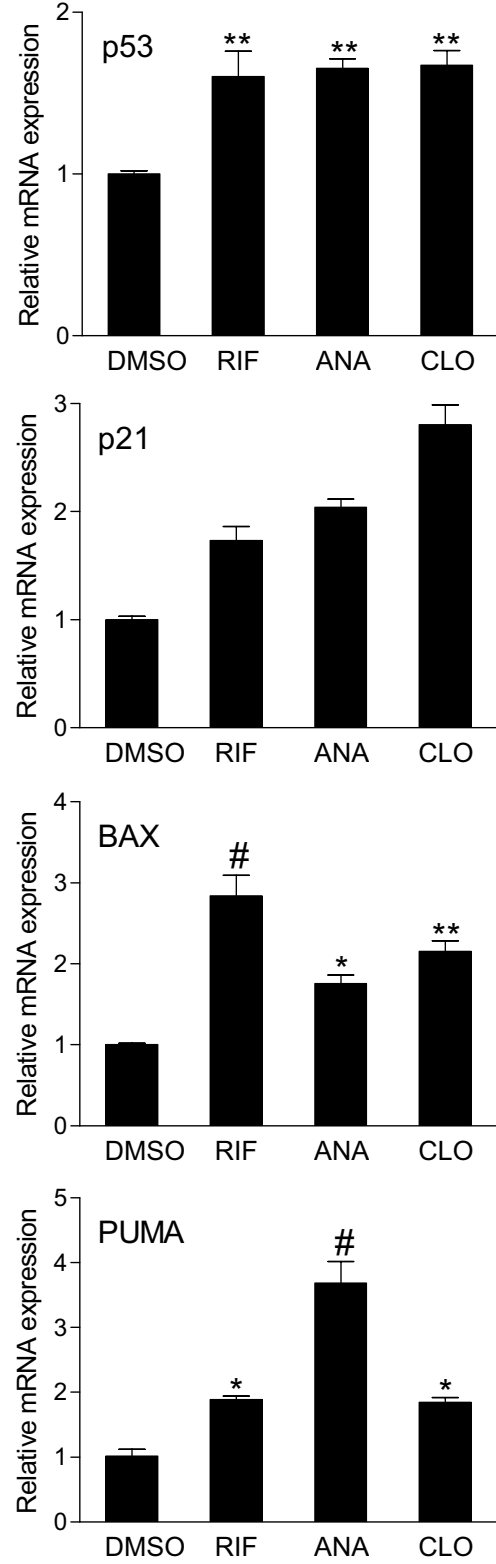

C

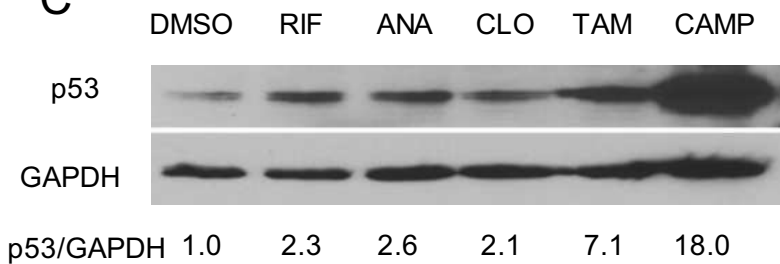

D

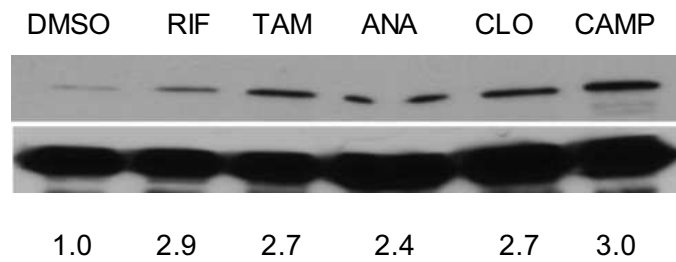

Supplement: MOESM4 [file 9472512]
